# Supplementary material for: Phthalate Exposures and MicroRNA Expression in Uterine Fibroids: The FORGE Study
Source: PubMed Central journal article supplement — Epigenet Insights. 2020 Feb 18;13:2516865720904057. doi: 10.1177/2516865720904057 (PMC7031793; doi:10.1177/2516865720904057), 2020-02-18
Supplement: Supplemental_Materials_2020.01.27.pdf [file Supplemental_Materials_2020.01.27.pdf]

## Supplemental Materials

Phthalate exposures and microRNA expression in uterine fibroid tissue: The FORGE Study

Ami R. Zota, Sc.D.<sup>1</sup>, Ruth J. Geller, M.H.S.<sup>1</sup>, Brianna VanNoy, M.P.H.<sup>1</sup>, Cherie Q. Marfori, M.D.<sup>2</sup>, Sana Tabbara, M.D.<sup>3</sup>, Lisa Y. Hu, B.S.<sup>4</sup>, Andrea A. Baccarelli, M.D., Ph.D.<sup>4</sup>, Gaby N. Moawad, M.D.<sup>2</sup>

<sup>1</sup>Department of Environmental and Occupational Health, The George Washington University Milken Institute School of Public Health, Washington DC, USA

<sup>2</sup>Department of Obstetrics and Gynecology, The George Washington University, Washington DC, USA

<sup>3</sup>Department of Pathology, The George Washington University, Washington DC, USA

<sup>4</sup>Department of Environmental Health Sciences, Columbia University Mailman School of Public Health, New York, NY, USA

Address correspondence to:

Ami R. Zota, ScD, MS  
Department of Environmental and Occupational Health  
Milken Institute School of Public Health  
The George Washington University  
950 New Hampshire Avenue NW  
Washington, DC 20052  
Phone: 202-994-9289  
Email: azota@gwu.edu

Table S1. Common sources of phthalates measured in FORGE study

| Phthalate                            | Urinary metabolites                                                                                                                                                                    | Common sources                                                                        |
|--------------------------------------|----------------------------------------------------------------------------------------------------------------------------------------------------------------------------------------|---------------------------------------------------------------------------------------|
| Diethyl phthalate (DEP)              | Monoethyl phthalate (MEP)                                                                                                                                                              | Fragrance, cosmetics, medications <sup>a,b,c</sup>                                    |
| Di- <i>n</i> -butyl phthalate (DnBP) | Mono- <i>n</i> -butyl phthalate (MnBP)<br>Mono-hydroxybutyl phthalate (MHBP)                                                                                                           | Cosmetics, medications, food packaging, food, PVC applications <sup>a,c,d,e,f,k</sup> |
| Diisobutyl phthalate (DiBP)          | Monoisobutyl phthalate (MiBP)<br>Mono-hydroxyisobutyl phthalate (MHiBP)                                                                                                                | Cosmetics, food, food packaging <sup>a,b,d,e</sup>                                    |
| Butylbenzyl phthalate (BBzP)         | Monobenzyl phthalate (MBzP)                                                                                                                                                            | PVC flooring, food, food packaging <sup>d,h</sup>                                     |
| Di- <i>n</i> -octyl phthalate (DnOP) | Mono(3-carboxypropyl) phthalate (MCP)                                                                                                                                                  | PVC applications, food, food packaging <sup>d,e,f</sup>                               |
| Diisononyl phthalate (DiNP)          | Monocarboxyooctyl phthalate (MCOP)                                                                                                                                                     | PVC applications, toys, flooring, wall covering <sup>f,i,j</sup>                      |
| Diisodecyl phthalate (DiDP)          | Monocarboxynonyl phthalate (MCNP)                                                                                                                                                      | PVC applications, toys, wires and cables, flooring <sup>f,i,j</sup>                   |
| Di(2-ethylhexyl) phthalate (DEHP)    | Mono(2-ethylhexyl) phthalate (MEHP)<br>Mono(2-ethyl-5-hydroxyhexyl) phthalate (MEHHP)<br>Mono(2-ethyl-5-oxohexyl) phthalate (MEOHP)<br>Mono(2-ethyl-5-carboxypentyl) phthalate (MECPP) | PVC applications, toys, cosmetics, food, food packaging <sup>a,b,d,e,f,k,i</sup>      |

<sup>a</sup>Koniecki et al. (2011), <sup>b</sup>Dodson et al. (2012), <sup>c</sup>Kelley et al. (2012), <sup>d</sup>Fierens et al. (2012), <sup>e</sup>Schechter et al. (2013), <sup>f</sup>Kawakami et al. (2011), <sup>g</sup>Cirillo et al. (2013), <sup>h</sup>Kavlock et al. (2002), <sup>i</sup>Stringer et al. (2000), <sup>j</sup>European Chemicals Agency (2012).

Table S2. Associations between individual phthalate biomarkers and miRNAs in fibroid tissue<sup>a</sup>

| Phthalate biomarker | miRNA name  | Estimate   | 95% CI         | P value      | FDR q-value <sup>b</sup> |      |
|---------------------|-------------|------------|----------------|--------------|--------------------------|------|
| MEP                 | miR-429     | -0.60      | (-0.93, -0.27) | 0.0006       | 0.24                     |      |
|                     | miR-548c-5p | -0.29      | (-0.47, -0.10) | 0.004        | 0.53                     |      |
|                     | miR-200b-3p | -0.46      | (-0.77, -0.16) | 0.004        | 0.53                     |      |
|                     | miR-645     | -0.77      | (-1.32, -0.23) | 0.007        | 0.66                     |      |
|                     | let-7f-2-3p | -0.21      | (-0.38, -0.05) | 0.01         | 0.75                     |      |
|                     | miR-124-3p  | -0.47      | (-0.83, -0.10) | 0.01         | 0.75                     |      |
|                     | miR-374a-5p | 0.96       | (0.17, 1.76)   | 0.02         | 0.75                     |      |
|                     | miR-31-3p   | 0.53       | (0.09, 0.97)   | 0.02         | 0.75                     |      |
|                     | miR-548d-5p | -0.23      | (-0.42, -0.04) | 0.02         | 0.75                     |      |
|                     | miR-216b-5p | -0.23      | (-0.43, -0.04) | 0.02         | 0.75                     |      |
|                     | miR-1243    | -0.44      | (-0.81, -0.07) | 0.02         | 0.75                     |      |
|                     | miR-651-5p  | -0.65      | (-1.21, -0.09) | 0.02         | 0.78                     |      |
|                     | miR-151a-3p | -0.57      | (-1.07, -0.07) | 0.03         | 0.83                     |      |
|                     | miR-635     | -0.27      | (-0.52, -0.02) | 0.04         | 0.96                     |      |
|                     | miR-564     | 0.79       | (0.05, 1.52)   | 0.04         | 0.96                     |      |
|                     | miR-550a-5p | -0.20      | (-0.39, -0.01) | 0.04         | 0.96                     |      |
|                     | miR-876-3p  | 0.19       | (0.01, 0.38)   | 0.04         | 0.97                     |      |
|                     | miR-192-5p  | -0.09      | (-0.19, 0.00)  | 0.04         | 0.97                     |      |
|                     | MnBP        | miR-338-5p | 1.55           | (0.53, 2.58) | 0.004                    | 0.73 |
|                     |             | miR-744-3p | 0.33           | (0.10, 0.55) | 0.005                    | 0.73 |
| miR-135b-5p         |             | 0.96       | (0.29, 1.62)   | 0.006        | 0.73                     |      |
| miR-7-2-3p          |             | 0.56       | (0.16, 0.97)   | 0.007        | 0.73                     |      |
| miR-494-3p          |             | -0.28      | (-0.49, -0.07) | 0.01         | 0.75                     |      |
| miR-1179            |             | 0.70       | (0.16, 1.24)   | 0.01         | 0.84                     |      |
| miR-135a-5p         |             | 0.89       | (0.12, 1.67)   | 0.02         | 0.99                     |      |
| miR-455-5p          |             | 0.42       | (0.04, 0.80)   | 0.03         | 0.99                     |      |
| miR-1226-5p         |             | -0.41      | (-0.79, -0.04) | 0.03         | 0.99                     |      |
| miR-659-3p          |             | 0.36       | (0.02, 0.70)   | 0.04         | 0.99                     |      |
| miR-214-3p          |             | -0.22      | (-0.43, -0.01) | 0.04         | 0.99                     |      |
| miR-34b-3p          |             | 0.30       | (0.01, 0.59)   | 0.04         | 0.99                     |      |
| miR-616-5p          |             | 0.20       | (0.00, 0.39)   | 0.05         | 0.99                     |      |
| MHBP                | miR-10a-5p  | 0.76       | (0.40, 1.11)   | 0.0001       | 0.05                     |      |
|                     | miR-30a-3p  | 0.65       | (0.25, 1.06)   | 0.002        | 0.40                     |      |
|                     | miR-142-5p  | 0.70       | (0.24, 1.15)   | 0.004        | 0.40                     |      |
|                     | miR-142-3p  | 0.75       | (0.25, 1.25)   | 0.004        | 0.40                     |      |
|                     | miR-744-3p  | 0.48       | (0.15, 0.80)   | 0.006        | 0.43                     |      |
|                     | miR-642a-5p | 1.25       | (0.36, 2.14)   | 0.007        | 0.44                     |      |

|       |               |       |                |       |      |
|-------|---------------|-------|----------------|-------|------|
|       | miR-378a-5p   | -1.25 | (-2.18, -0.32) | 0.01  | 0.54 |
|       | miR-455-5p    | 0.69  | (0.15, 1.23)   | 0.01  | 0.60 |
|       | miR-10a-3p    | 0.57  | (0.11, 1.02)   | 0.02  | 0.60 |
|       | miR-15a-3p    | 0.61  | (0.09, 1.12)   | 0.02  | 0.60 |
|       | miR-410-3p    | 0.63  | (0.09, 1.17)   | 0.02  | 0.60 |
|       | miR-191-3p    | 0.54  | (0.07, 1.01)   | 0.03  | 0.60 |
|       | miR-154-5p    | 1.66  | (0.20, 3.11)   | 0.03  | 0.60 |
|       | miR-181a-2-3p | 0.58  | (0.05, 1.10)   | 0.03  | 0.60 |
|       | miR-125b-1-3p | 0.42  | (0.03, 0.81)   | 0.03  | 0.60 |
|       | miR-660-5p    | 0.60  | (0.05, 1.16)   | 0.03  | 0.60 |
|       | miR-182-5p    | 1.23  | (0.07, 2.38)   | 0.04  | 0.60 |
|       | miR-125b-5p   | 0.60  | (0.03, 1.18)   | 0.04  | 0.60 |
|       | miR-216b-5p   | 0.49  | (0.01, 0.97)   | 0.04  | 0.60 |
|       | miR-720       | 0.67  | (0.02, 1.31)   | 0.04  | 0.60 |
|       | miR-579-3p    | 0.48  | (0.00, 0.95)   | 0.05  | 0.60 |
| MiBP  | miR-7-2-3p    | 0.73  | (0.23, 1.23)   | 0.006 | 0.68 |
|       | miR-135a-5p   | 1.32  | (0.35, 2.28)   | 0.009 | 0.68 |
|       | miR-660-5p    | 0.61  | (0.15, 1.08)   | 0.01  | 0.68 |
|       | miR-218-5p    | 0.60  | (0.13, 1.07)   | 0.01  | 0.68 |
|       | miR-378a-5p   | -1.03 | (-1.84, -0.22) | 0.01  | 0.68 |
|       | miR-1179      | 0.84  | (0.17, 1.52)   | 0.02  | 0.68 |
|       | miR-501-5p    | 0.45  | (0.09, 0.82)   | 0.02  | 0.68 |
|       | miR-154-3p    | -0.65 | (-1.17, -0.12) | 0.02  | 0.68 |
|       | miR-744-3p    | 0.35  | (0.06, 0.64)   | 0.02  | 0.68 |
|       | miR-181a-2-3p | 0.54  | (0.10, 0.99)   | 0.02  | 0.68 |
|       | miR-10a-5p    | 0.42  | (0.07, 0.77)   | 0.02  | 0.68 |
|       | miR-532-5p    | 0.53  | (0.08, 0.98)   | 0.02  | 0.68 |
|       | miR-135b-5p   | 1.02  | (0.14, 1.89)   | 0.02  | 0.68 |
|       | miR-184       | -0.62 | (-1.15, -0.08) | 0.02  | 0.68 |
|       | miR-502-5p    | 0.54  | (0.05, 1.03)   | 0.03  | 0.80 |
|       | miR-502-3p    | 0.55  | (0.05, 1.06)   | 0.03  | 0.80 |
|       | miR-1226-5p   | -0.49 | (-0.94, -0.03) | 0.04  | 0.80 |
|       | miR-106b-5p   | 0.37  | (0.02, 0.72)   | 0.04  | 0.80 |
|       | miR-494-3p    | -0.29 | (-0.56, -0.01) | 0.04  | 0.90 |
|       | miR-30a-3p    | 0.38  | (0.00, 0.75)   | 0.05  | 0.91 |
| MHiBP | miR-10a-5p    | 0.58  | (0.23, 0.93)   | 0.002 | 0.61 |
|       | miR-30a-3p    | 0.53  | (0.15, 0.90)   | 0.007 | 0.75 |
|       | miR-154-3p    | -0.71 | (-1.24, -0.17) | 0.01  | 0.75 |
|       | miR-744-3p    | 0.39  | (0.09, 0.69)   | 0.01  | 0.75 |
|       | miR-7-2-3p    | 0.67  | (0.16, 1.19)   | 0.01  | 0.75 |

|      |               |       |                |        |      |
|------|---------------|-------|----------------|--------|------|
|      | miR-660-5p    | 0.64  | (0.14, 1.13)   | 0.01   | 0.75 |
|      | miR-532-5p    | 0.59  | (0.12, 1.06)   | 0.01   | 0.75 |
|      | miR-501-5p    | 0.47  | (0.08, 0.85)   | 0.02   | 0.75 |
|      | miR-502-5p    | 0.62  | (0.11, 1.13)   | 0.02   | 0.75 |
|      | miR-184       | -0.67 | (-1.23, -0.11) | 0.02   | 0.75 |
|      | miR-181a-2-3p | 0.55  | (0.08, 1.02)   | 0.02   | 0.81 |
|      | miR-502-3p    | 0.61  | (0.07, 1.14)   | 0.03   | 0.81 |
|      | miR-218-5p    | 0.57  | (0.07, 1.07)   | 0.03   | 0.81 |
|      | miR-1179      | 0.77  | (0.04, 1.49)   | 0.04   | 0.91 |
|      | miR-191-3p    | 0.45  | (0.02, 0.88)   | 0.04   | 0.91 |
|      | miR-532-3p    | 0.49  | (0.02, 0.95)   | 0.04   | 0.91 |
|      | miR-500a-5p   | 0.55  | (0.01, 1.08)   | 0.04   | 0.91 |
|      | miR-378a-5p   | -0.90 | (-1.77, -0.02) | 0.05   | 0.91 |
|      | miR-362-5p    | 0.64  | (0.01, 1.28)   | 0.05   | 0.91 |
|      | miR-15a-3p    | 0.43  | (0.01, 0.86)   | 0.05   | 0.91 |
| MBzP | miR-1227-3p   | 0.30  | (0.03, 0.57)   | 0.03   | 1.00 |
|      | miR-494-3p    | -0.19 | (-0.38, -0.01) | 0.04   | 1.00 |
| MCPP | miR-154-5p    | 1.27  | (0.61, 1.93)   | 0.0004 | 0.15 |
|      | miR-7-5p      | 0.54  | (0.19, 0.90)   | 0.004  | 0.54 |
|      | miR-659-3p    | 0.37  | (0.12, 0.63)   | 0.005  | 0.54 |
|      | miR-142-5p    | 0.36  | (0.11, 0.61)   | 0.006  | 0.54 |
|      | miR-545-5p    | 0.45  | (0.12, 0.77)   | 0.009  | 0.54 |
|      | miR-30d-3p    | 0.24  | (0.06, 0.42)   | 0.01   | 0.54 |
|      | miR-483-5p    | -0.46 | (-0.81, -0.11) | 0.01   | 0.54 |
|      | miR-337-5p    | 0.95  | (0.22, 1.68)   | 0.01   | 0.54 |
|      | miR-429       | 0.58  | (0.13, 1.03)   | 0.01   | 0.54 |
|      | miR-144-5p    | 0.55  | (0.11, 0.99)   | 0.02   | 0.61 |
|      | miR-10a-3p    | 0.30  | (0.05, 0.54)   | 0.02   | 0.61 |
|      | miR-548J-5p   | 0.79  | (0.14, 1.43)   | 0.02   | 0.61 |
|      | miR-21-3p     | -0.28 | (-0.53, -0.04) | 0.02   | 0.70 |
|      | miR-182-5p    | 0.69  | (0.09, 1.30)   | 0.03   | 0.70 |
|      | miR-629-3p    | 0.19  | (0.02, 0.36)   | 0.03   | 0.70 |
|      | miR-495-3p    | 0.46  | (0.05, 0.88)   | 0.03   | 0.72 |
|      | miR-376a-3p   | 0.34  | (0.03, 0.66)   | 0.03   | 0.74 |
|      | miR-592       | -0.39 | (-0.76, -0.03) | 0.03   | 0.75 |
|      | miR-449b-5p   | 0.35  | (0.01, 0.68)   | 0.04   | 0.81 |
|      | miR-10a-5p    | 0.23  | (0.01, 0.45)   | 0.04   | 0.81 |
|      | miR-720       | -0.36 | (-0.70, -0.01) | 0.04   | 0.81 |
|      | miR-886-5p    | -0.36 | (-0.72, -0.01) | 0.05   | 0.81 |
| MCOP | miR-21-3p     | -0.29 | (-0.47, -0.12) | 0.002  | 0.35 |

|      |             |       |                |       |      |
|------|-------------|-------|----------------|-------|------|
|      | miR-582-3p  | -0.28 | (-0.45, -0.11) | 0.002 | 0.35 |
|      | miR-449b-5p | 0.37  | (0.13, 0.62)   | 0.004 | 0.46 |
|      | miR-601     | -0.58 | (-1.03, -0.13) | 0.01  | 0.69 |
|      | miR-154-3p  | -0.32 | (-0.57, -0.07) | 0.01  | 0.69 |
|      | miR-154-5p  | 0.72  | (0.16, 1.28)   | 0.01  | 0.69 |
|      | miR-720     | -0.32 | (-0.58, -0.07) | 0.01  | 0.69 |
|      | miR-375-3p  | 0.37  | (0.07, 0.66)   | 0.02  | 0.69 |
|      | miR-629-3p  | 0.16  | (0.03, 0.28)   | 0.02  | 0.69 |
|      | miR-7-2-3p  | 0.30  | (0.06, 0.54)   | 0.02  | 0.69 |
|      | miR-449a    | 0.42  | (0.06, 0.79)   | 0.02  | 0.79 |
|      | miR-577     | 0.41  | (0.06, 0.76)   | 0.02  | 0.79 |
|      | miR-142-5p  | 0.22  | (0.02, 0.42)   | 0.04  | 0.80 |
|      | miR-592     | -0.30 | (-0.59, -0.02) | 0.04  | 0.80 |
|      | miR-182-5p  | 0.50  | (0.03, 0.97)   | 0.04  | 0.80 |
|      | miR-886-3p  | -0.30 | (-0.59, -0.01) | 0.04  | 0.80 |
|      | miR-144-5p  | 0.37  | (0.01, 0.72)   | 0.04  | 0.80 |
|      | miR-7-5p    | 0.29  | (0.01, 0.58)   | 0.05  | 0.80 |
|      | miR-181c-3p | -0.13 | (-0.26, 0.00)  | 0.05  | 0.80 |
|      | miR-137-3p  | -0.37 | (-0.74, 0.00)  | 0.05  | 0.80 |
| MCNP | miR-590-3p  | 0.70  | (0.27, 1.14)   | 0.002 | 0.87 |
|      | miR-154-5p  | 1.15  | (0.34, 1.96)   | 0.007 | 0.87 |
|      | miR-10a-3p  | 0.38  | (0.11, 0.66)   | 0.008 | 0.87 |
|      | miR-339-5p  | 0.31  | (0.08, 0.53)   | 0.009 | 0.87 |
|      | miR-601     | -0.84 | (-1.51, -0.18) | 0.01  | 0.87 |
|      | miR-629-3p  | 0.24  | (0.05, 0.42)   | 0.02  | 0.87 |
|      | miR-944     | 0.61  | (0.11, 1.11)   | 0.02  | 0.87 |
|      | miR-449b-5p | 0.46  | (0.08, 0.83)   | 0.02  | 0.87 |
|      | miR-708-5p  | -0.40 | (-0.73, -0.06) | 0.02  | 0.92 |
|      | miR-21-3p   | -0.32 | (-0.59, -0.04) | 0.03  | 0.92 |
|      | miR-592     | -0.47 | (-0.88, -0.05) | 0.03  | 0.92 |
|      | miR-628-3p  | 0.26  | (0.03, 0.49)   | 0.03  | 0.92 |
|      | miR-342-5p  | 0.46  | (0.04, 0.87)   | 0.03  | 0.92 |
|      | miR-1180-3p | 0.34  | (0.02, 0.66)   | 0.04  | 0.92 |
|      | miR-376b-3p | -0.28 | (-0.55, -0.02) | 0.04  | 0.92 |
|      | miR-720     | -0.40 | (-0.79, -0.02) | 0.04  | 0.92 |
|      | miR-582-3p  | -0.27 | (-0.53, -0.01) | 0.04  | 0.92 |
|      | miR-370-3p  | 0.18  | (0.01, 0.36)   | 0.04  | 0.92 |
|      | miR-150-5p  | 0.35  | (0.01, 0.69)   | 0.05  | 0.93 |
| MEHP | miR-635     | 0.70  | (0.27, 1.14)   | 0.002 | 0.67 |
|      | miR-548c-5p | 0.46  | (0.14, 0.79)   | 0.006 | 0.67 |

|       |              |       |                |        |      |
|-------|--------------|-------|----------------|--------|------|
|       | miR-337-3p   | -0.41 | (-0.70, -0.11) | 0.008  | 0.67 |
|       | miR-380-5p   | 0.51  | (0.14, 0.88)   | 0.009  | 0.67 |
|       | miR-548d-5p  | 0.42  | (0.11, 0.74)   | 0.01   | 0.67 |
|       | miR-24-3p    | -0.24 | (-0.42, -0.06) | 0.01   | 0.67 |
|       | miR-128-3p   | -0.47 | (-0.83, -0.11) | 0.01   | 0.67 |
|       | miR-181c-3p  | -0.28 | (-0.51, -0.06) | 0.02   | 0.75 |
|       | miR-548L     | 0.53  | (0.07, 0.99)   | 0.03   | 0.90 |
|       | miR-485-3p   | -0.51 | (-0.97, -0.06) | 0.03   | 0.90 |
|       | miR-182-5p   | 0.93  | (0.08, 1.79)   | 0.03   | 0.90 |
|       | miR-888-5p   | 1.26  | (0.10, 2.43)   | 0.03   | 0.90 |
|       | miR-564      | 1.44  | (0.11, 2.78)   | 0.03   | 0.90 |
|       | miR-659-3p   | 0.48  | (0.04, 0.92)   | 0.03   | 0.90 |
|       | miR-484      | -0.54 | (-1.05, -0.04) | 0.04   | 0.90 |
|       | miR-16-5p    | -0.38 | (-0.73, -0.02) | 0.04   | 0.90 |
|       | miR-577      | 0.66  | (0.01, 1.32)   | 0.05   | 0.90 |
|       | miR-154-5p   | 1.05  | (0.01, 2.10)   | 0.05   | 0.90 |
|       | miR-92a-1-5p | 0.34  | (0.00, 0.69)   | 0.05   | 0.90 |
| MEHHP | miR-577      | 1.06  | (0.53, 1.59)   | 0.0003 | 0.10 |
|       | miR-1179     | 0.89  | (0.37, 1.41)   | 0.001  | 0.23 |
|       | miR-7-2-3p   | 0.61  | (0.25, 0.98)   | 0.002  | 0.23 |
|       | miR-192-3p   | 0.48  | (0.18, 0.78)   | 0.003  | 0.28 |
|       | miR-7-5p     | 0.65  | (0.22, 1.09)   | 0.004  | 0.32 |
|       | miR-616-5p   | 0.25  | (0.07, 0.43)   | 0.008  | 0.50 |
|       | miR-572      | -0.45 | (-0.79, -0.11) | 0.01   | 0.60 |
|       | miR-106b-5p  | 0.35  | (0.07, 0.63)   | 0.02   | 0.60 |
|       | miR-887-3p   | 0.33  | (0.06, 0.60)   | 0.02   | 0.60 |
|       | miR-744-3p   | 0.28  | (0.05, 0.52)   | 0.02   | 0.60 |
|       | miR-26b-3p   | 0.40  | (0.06, 0.74)   | 0.02   | 0.60 |
|       | miR-627-5p   | 0.40  | (0.06, 0.74)   | 0.02   | 0.60 |
|       | miR-193a-3p  | 0.57  | (0.07, 1.07)   | 0.03   | 0.60 |
|       | miR-218-5p   | 0.44  | (0.05, 0.83)   | 0.03   | 0.60 |
|       | let-7i-3p    | 0.45  | (0.06, 0.85)   | 0.03   | 0.60 |
|       | miR-99a-3p   | 0.52  | (0.06, 0.99)   | 0.03   | 0.60 |
|       | miR-1274B    | -0.38 | (-0.72, -0.05) | 0.03   | 0.60 |
|       | miR-601      | -0.87 | (-1.65, -0.10) | 0.03   | 0.60 |
|       | miR-20b-5p   | 0.27  | (0.03, 0.51)   | 0.03   | 0.62 |
|       | miR-545-5p   | 0.48  | (0.04, 0.93)   | 0.03   | 0.62 |
|       | miR-93-5p    | 0.27  | (0.02, 0.52)   | 0.04   | 0.62 |
|       | miR-10b-5p   | 0.40  | (0.02, 0.78)   | 0.04   | 0.62 |
|       | miR-194-5p   | 0.18  | (0.01, 0.36)   | 0.04   | 0.62 |

|       |               |       |                |       |      |
|-------|---------------|-------|----------------|-------|------|
|       | miR-570-3p    | 0.26  | (0.01, 0.51)   | 0.04  | 0.62 |
|       | miR-338-5p    | 1.16  | (0.04, 2.27)   | 0.04  | 0.62 |
|       | miR-542-5p    | 0.38  | (0.01, 0.75)   | 0.04  | 0.62 |
|       | miR-335-3p    | 0.49  | (0.02, 0.96)   | 0.04  | 0.62 |
|       | miR-659-3p    | 0.38  | (0.01, 0.74)   | 0.05  | 0.65 |
| MEOHP | miR-1179      | 0.85  | (0.37, 1.33)   | 0.001 | 0.27 |
|       | miR-577       | 0.88  | (0.36, 1.40)   | 0.002 | 0.27 |
|       | miR-572       | -0.50 | (-0.81, -0.19) | 0.002 | 0.27 |
|       | miR-26b-3p    | 0.47  | (0.16, 0.77)   | 0.004 | 0.29 |
|       | miR-7-5p      | 0.62  | (0.22, 1.03)   | 0.004 | 0.29 |
|       | miR-20b-5p    | 0.32  | (0.10, 0.54)   | 0.005 | 0.29 |
|       | miR-7-2-3p    | 0.53  | (0.17, 0.88)   | 0.005 | 0.29 |
|       | miR-93-5p     | 0.32  | (0.10, 0.55)   | 0.006 | 0.29 |
|       | miR-192-3p    | 0.41  | (0.12, 0.70)   | 0.007 | 0.32 |
|       | miR-106b-5p   | 0.35  | (0.09, 0.61)   | 0.009 | 0.33 |
|       | miR-93-3p     | 0.40  | (0.10, 0.70)   | 0.01  | 0.34 |
|       | miR-18a-3p    | 0.45  | (0.11, 0.78)   | 0.01  | 0.34 |
|       | miR-99a-3p    | 0.55  | (0.13, 0.97)   | 0.01  | 0.37 |
|       | miR-887-3p    | 0.32  | (0.07, 0.58)   | 0.01  | 0.37 |
|       | miR-10b-5p    | 0.44  | (0.09, 0.78)   | 0.02  | 0.39 |
|       | miR-191-3p    | 0.37  | (0.06, 0.67)   | 0.02  | 0.44 |
|       | miR-30a-3p    | 0.33  | (0.06, 0.61)   | 0.02  | 0.44 |
|       | miR-744-3p    | 0.26  | (0.04, 0.48)   | 0.02  | 0.44 |
|       | miR-194-5p    | 0.19  | (0.03, 0.35)   | 0.02  | 0.45 |
|       | miR-616-5p    | 0.20  | (0.03, 0.38)   | 0.03  | 0.49 |
|       | miR-218-5p    | 0.40  | (0.04, 0.76)   | 0.03  | 0.54 |
|       | miR-30d-3p    | 0.25  | (0.02, 0.48)   | 0.03  | 0.54 |
|       | miR-26a-1-3p  | 0.48  | (0.04, 0.92)   | 0.03  | 0.54 |
|       | miR-601       | -0.79 | (-1.51, -0.06) | 0.04  | 0.57 |
|       | miR-769-5p    | 0.23  | (0.01, 0.44)   | 0.04  | 0.59 |
|       | miR-335-3p    | 0.46  | (0.02, 0.91)   | 0.04  | 0.59 |
|       | miR-181a-2-3p | 0.36  | (0.01, 0.70)   | 0.04  | 0.60 |
|       | miR-106b-3p   | 0.33  | (0.01, 0.64)   | 0.04  | 0.60 |
| MECPP | miR-577       | 1.01  | (0.41, 1.62)   | 0.002 | 0.61 |
|       | miR-93-5p     | 0.39  | (0.13, 0.65)   | 0.004 | 0.62 |
|       | miR-106b-5p   | 0.44  | (0.14, 0.74)   | 0.005 | 0.62 |
|       | miR-7-5p      | 0.66  | (0.16, 1.16)   | 0.01  | 0.71 |
|       | miR-1179      | 0.79  | (0.18, 1.40)   | 0.01  | 0.71 |
|       | miR-572       | -0.47 | (-0.85, -0.09) | 0.02  | 0.71 |
|       | miR-10b-5p    | 0.50  | (0.09, 0.90)   | 0.02  | 0.71 |



|            |             |       |                |        |      |
|------------|-------------|-------|----------------|--------|------|
|            | miR-106b-3p | 0.45  | (0.08, 0.82)   | 0.02   | 0.71 |
|            | miR-27b-5p  | 0.46  | (0.07, 0.85)   | 0.02   | 0.71 |
|            | miR-20b-5p  | 0.31  | (0.04, 0.57)   | 0.02   | 0.71 |
|            | miR-26b-3p  | 0.43  | (0.05, 0.81)   | 0.03   | 0.71 |
|            | miR-21-3p   | -0.37 | (-0.71, -0.04) | 0.03   | 0.71 |
|            | miR-1260a   | -0.43 | (-0.83, -0.04) | 0.03   | 0.71 |
|            | miR-542-3p  | 0.54  | (0.05, 1.03)   | 0.03   | 0.71 |
|            | miR-30d-3p  | 0.29  | (0.03, 0.55)   | 0.03   | 0.71 |
|            | miR-192-3p  | 0.39  | (0.03, 0.75)   | 0.04   | 0.71 |
|            | miR-99a-3p  | 0.54  | (0.02, 1.05)   | 0.04   | 0.71 |
|            | miR-758-3p  | 1.35  | (0.03, 2.67)   | 0.05   | 0.71 |
|            | miR-29c-3p  | 0.39  | (0.00, 0.78)   | 0.05   | 0.71 |
|            | miR-30a-3p  | 0.33  | (0.00, 0.66)   | 0.05   | 0.71 |
|            | miR-27b-3p  | 0.50  | (0.00, 1.00)   | 0.05   | 0.71 |
| ΣDEHP      | miR-577     | 1.13  | (0.53, 1.72)   | 0.0004 | 0.17 |
|            | miR-1179    | 0.92  | (0.33, 1.51)   | 0.003  | 0.42 |
|            | miR-572     | -0.55 | (-0.92, -0.18) | 0.005  | 0.42 |
|            | miR-106b    | 0.44  | (0.14, 0.74)   | 0.005  | 0.42 |
|            | miR-93-5p   | 0.38  | (0.12, 0.64)   | 0.006  | 0.42 |
|            | miR-7-5p    | 0.70  | (0.21, 1.19)   | 0.007  | 0.42 |
|            | miR-26b-3p  | 0.49  | (0.12, 0.87)   | 0.01   | 0.51 |
|            | miR-192-3p  | 0.46  | (0.11, 0.81)   | 0.01   | 0.51 |
|            | miR-20b-5p  | 0.34  | (0.08, 0.60)   | 0.01   | 0.51 |
|            | miR-10b-5p  | 0.52  | (0.12, 0.93)   | 0.01   | 0.51 |
|            | miR-7-2-3p  | 0.56  | (0.11, 1.01)   | 0.02   | 0.54 |
|            | miR-99a-3p  | 0.61  | (0.11, 1.12)   | 0.02   | 0.60 |
|            | miR-887-3p  | 0.35  | (0.05, 0.66)   | 0.02   | 0.71 |
|            | miR-542-3p  | 0.56  | (0.07, 1.05)   | 0.03   | 0.71 |
|            | miR-106b*   | 0.42  | (0.04, 0.79)   | 0.03   | 0.71 |
|            | miR-194-5p  | 0.21  | (0.01, 0.40)   | 0.04   | 0.71 |
|            | miR-29a-3p  | 0.54  | (0.04, 1.04)   | 0.04   | 0.71 |
|            | miR-27b-5p  | 0.42  | (0.03, 0.82)   | 0.04   | 0.71 |
|            | miR-18a-3p  | 0.43  | (0.03, 0.84)   | 0.04   | 0.71 |
|            | miR-30d-3p  | 0.28  | (0.01, 0.55)   | 0.04   | 0.71 |
|            | miR-485-3p  | -0.46 | (-0.90, -0.02) | 0.04   | 0.71 |
|            | miR-29c-3p  | 0.40  | (0.01, 0.79)   | 0.05   | 0.71 |
|            | miR-135a-5p | 0.90  | (0.01, 1.80)   | 0.05   | 0.71 |
| ΣAA        | miR-7-5p    | 0.80  | (0.31, 1.29)   | 0.002  | 0.35 |
| Phthalates | miR-7-2-3p  | 0.68  | (0.26, 1.10)   | 0.003  | 0.35 |

|             |       |                |       |      |
|-------------|-------|----------------|-------|------|
| miR-577     | 0.97  | (0.36, 1.59)   | 0.003 | 0.35 |
| miR-572     | -0.56 | (-0.93, -0.20) | 0.004 | 0.35 |
| miR-1179    | 0.85  | (0.26, 1.43)   | 0.006 | 0.45 |
| miR-21-3p   | -0.41 | (-0.74, -0.08) | 0.02  | 0.92 |
| miR-483-5p  | -0.58 | (-1.08, -0.07) | 0.03  | 0.92 |
| miR-106b-5p | 0.34  | (0.03, 0.65)   | 0.03  | 0.92 |
| miR-363-3p  | 0.36  | (0.03, 0.70)   | 0.03  | 0.92 |
| miR-18a-3p  | 0.41  | (0.00, 0.82)   | 0.05  | 0.92 |
| miR-520d-3p | -2.09 | (-4.17, -0.01) | 0.05  | 0.92 |

<sup>a</sup>Associations at  $p < 0.05$  are shown. All associations are adjusted for age, BMI, and race/ethnicity. Lower  $\Delta C_q$  indicates higher relative miRNA expression.

<sup>b</sup>FDR q-values were calculated separately for each phthalate biomarker using Benjamini-Hochberg procedure.

Figure S1. Pathway analysis illustrating the link between phthalate-associated miRNAs in fibroid tissue and biological function and disease pathways related to fibroid pathogenesis.

Fibroid-specific pathways\_2019.03.15v2

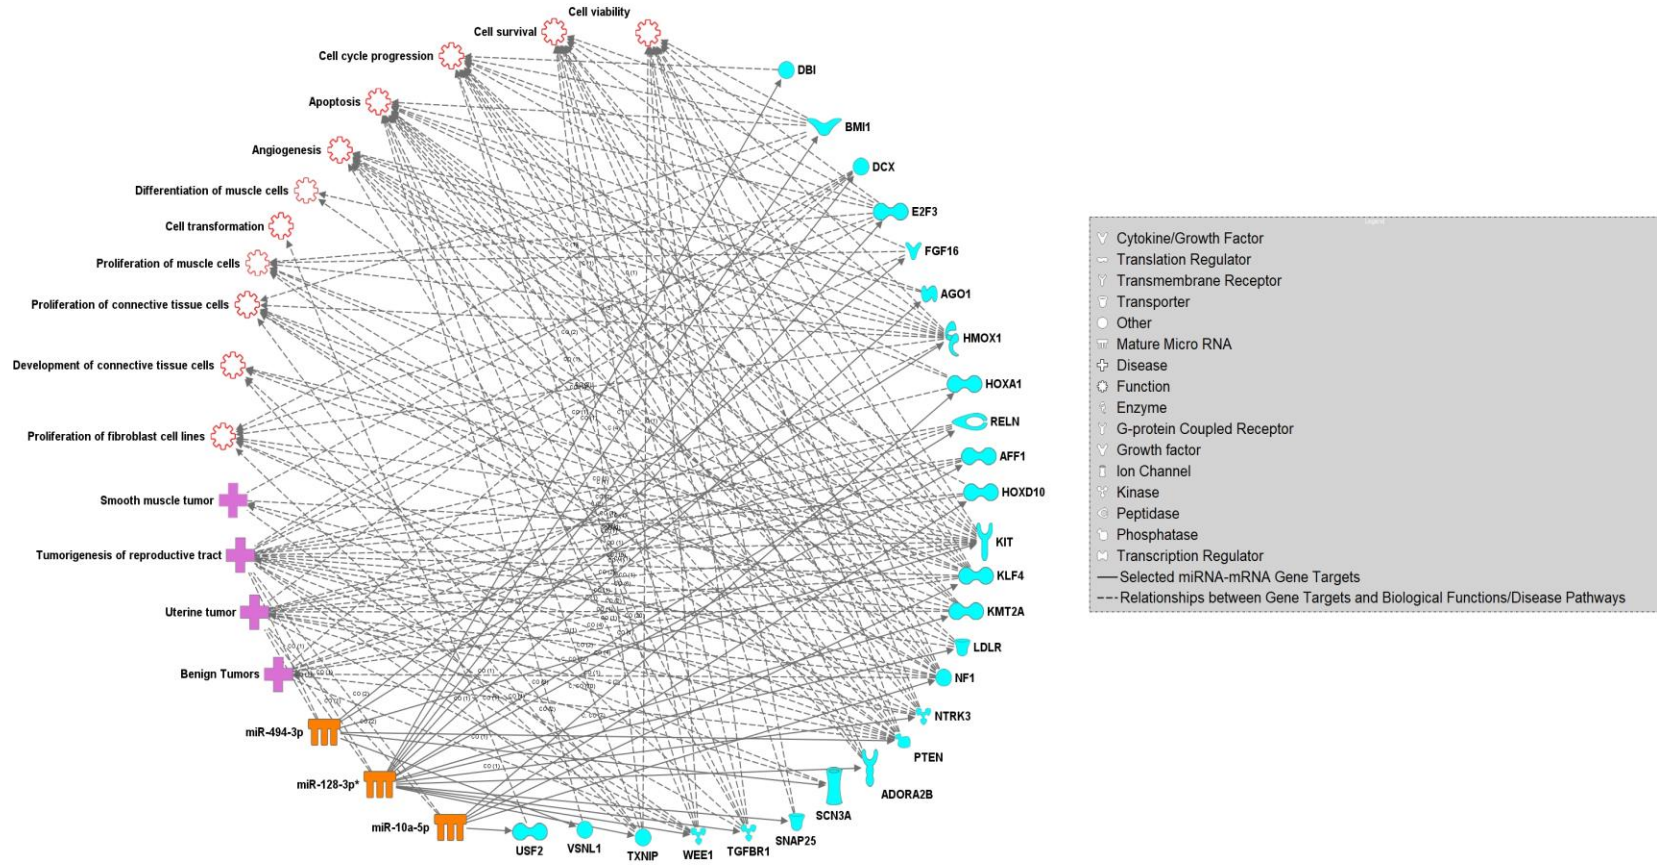

© 2000-2019 QAGOLD. All rights reserved.

## References:

1. Benjamini Y, Hochberg Y. Controlling the false discovery rate: A practical and powerful approach to multiple testing. *Journal of Royal Statistical Society Series B (Methodological)* 1995;57:289-300.
2. Cirillo T, Fasano E, Esposito F, Del Prete E, Cocchieri RA. Study on the influence of temperature, storage time and packaging type on di-n-butylphthalate and di(2-ethylhexyl) phthalate release into packed meals. *Food Addit Contam Part A Chem Anal Control Expo Risk Assess* 2013;30:403–411.
3. Dodson RE, Nishioka M, Standley LJ, Perovich LJ, Brody JG, Rudel RA. Endocrine disruptors and asthma- associated chemicals in consumer products. *Environ Health Perspect* 2012;120:935–943.
4. European Chemicals Agency. 2012. Evaluation of New Scientific Evidence Concerning DINP and DIDP in Relation to Entry 52 of Annex XVII to Regulation (EC) No 1907/2006 (REACH).
5. Fierens T, Servaes K, Van Holderbeke M, Geerts L, De Henauw S, Sioen I, et al. Analysis of phthalates in food products and packaging materials sold on the Belgian market. *Food Chem Toxicol* 2012;50:2575–2583.
6. Kavlock R, Boekelheide K, Chapin R, Cunningham M, Faustman E, Foster P, et al. NTP Center for the Evaluation of Risks to Human Reproduction: phthalates expert panel report on the reproductive and developmental toxicity of butyl benzyl phthalate. *Reprod Toxicol* 2002;16:453–487.
7. Kawakami T, Isama K, Matsuoka A. Analysis of phthalic acid diesters, monoester, and other plasticizers in polyvinyl chloride household products in Japan. *J Environ Sci Health A Tox Hazard Subst Environ Eng* 2011;46:855–864.
8. Kelley KE, Hernandez-Diaz S, Chaplin EL, Hauser R, Mitchell AA. Identification of phthalates in medications and dietary supplement formulations in the United States and Canada. *Environ Health Perspect* 2012;120:379–384.
9. Koniecki D, Wang R, Moody RP, Zhu J. Phthalates in cosmetic and personal care products: concentrations and possible dermal exposure. *Environ Res* 2011;111:329–336.
10. Schechter A, Lorber M, Guo Y, Wu Q, Yun SH, Kannan K, et al. Phthalate concentrations and dietary exposure from food purchased in New York State. *Environ Health Perspect* 2013;121:473–494.
11. Stringer R, Labunska I, Santillo D, Johnston P, Siddorn J, Stephenson A. Concentrations of phthalate esters and identification of other additives in PVC children's toys. *Environ Sci Pollut Res Int* 2000;7:27–36.
